# Supplementary material for: Insights into Ni3TeO6 calcination via in situ synchrotron X-ray diffraction
Source: Phys Chem Chem Phys. 2024 Nov 1;26(46):28913–21. doi: 10.1039/d4cp03765k (PMC11563211; doi:10.1039/d4cp03765k)
Supplement: CP-026-D4CP03765K-s001 [file CP-026-D4CP03765K-s001.pdf]

## Supplementary Material

# Insights into Ni<sub>3</sub>TeO<sub>6</sub> calcination via in situ synchrotron X-ray diffraction

Shubo Wang <sup>a,\*</sup>, Javier Fernández-Catalá <sup>a,b</sup>, Qifeng Shu <sup>c</sup>, Marko Huttula <sup>a</sup>, Wei Cao <sup>a</sup>,  
Harishchandra Singh <sup>a,\*</sup>

<sup>a</sup> Nano and Molecular Systems Research Unit, University of Oulu, FIN-90014, Oulu, Finland

Materials Institute and Inorganic Chemistry Department, University of Alicante, Ap. 99, E-03080 Alicante, Spain.

\*Corresponding authors. E-mails: [shubo.wang@oulu.fi](mailto:shubo.wang@oulu.fi), [harishchandra.singh@oulu.fi](mailto:harishchandra.singh@oulu.fi).

### Detailed experimental methods

In situ SXRD measurements were conducted at the Brockhouse high energy wiggler beamline, Canadian Light Source (CLS), Canada. The powder NTO-hydro sample, loaded in a  $\Phi 0.9$  mm (inner dimension) quartz capillary, was heated using a flow-cell furnace [1] at ambient atmosphere but without air circulation, simulating the calcination procedure in our lab using muffle furnace. A 2D Perkin Elmer area detector ( $200 \times 200 \mu\text{m}^2$  pixel size,  $40 \times 40 \text{ cm}^2$  in area) placed behind the sample allowed 2D XRD diffraction pattern in transmission mode. Wavelength of the monochromatic X-ray beam ( $100 \mu\text{m}$  vertical and  $200 \mu\text{m}$  horizontal) and detector to sample distance were  $0.1779 \text{ \AA}$  and  $1144 \text{ mm}$ , calibrated using a standard Ni powder calibrants with known lattice parameter. Diffraction patterns were collected a  $50 \text{ }^\circ\text{C}$  step manner with an exposure time of  $2.0 \text{ s}$  that was much shorter than the continuous temperature ramping rate. Therefore, each frame corresponded to the exact specific temperature simultaneously recorded by the thermocouple. The obtained 2D diffraction patterns were integrated into 1D profiles using open-source GSAS-II software [2].

For DSC measurement, temperature and accuracy calibration were carried out using high-purity metals with well-known melting pointing as reference norms. During the measurement, Pt

crucibles with a Pt lid were employed to minimize the loss of materials, and alumina powders was employed as the inert reference material. NTO-hydro material was weighed to be 19.7 mg prior to measurement. The measured DSC heat flow and mass loss is representative of the energy (in unit of mW), and mass change (wt.% relative to the starting weight) as a function of temperature.

XPS measurements were performed with Al K $\alpha$  using Thermo Fisher Scientific ESCALAB 250Xi XPS System. Energy calibration of the XPS was performed by using the C 1s peak at 284.8 eV.

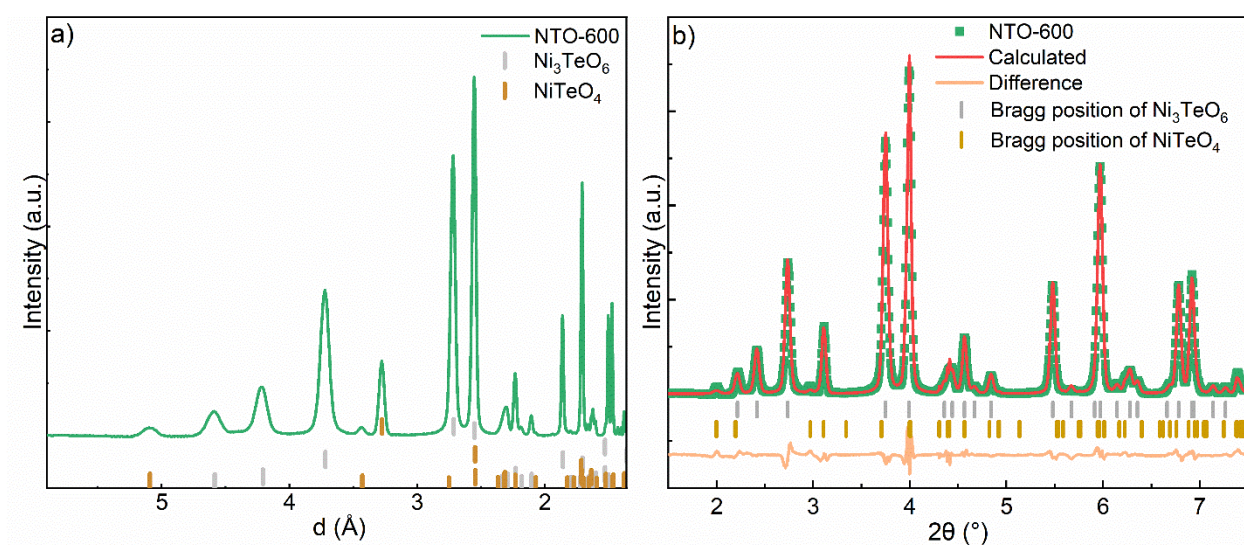

Fig. S1 (a) Enlarged view of the indexing results for the SXRD profile of NTO-600, and (b) corresponding Rietveld refinement.

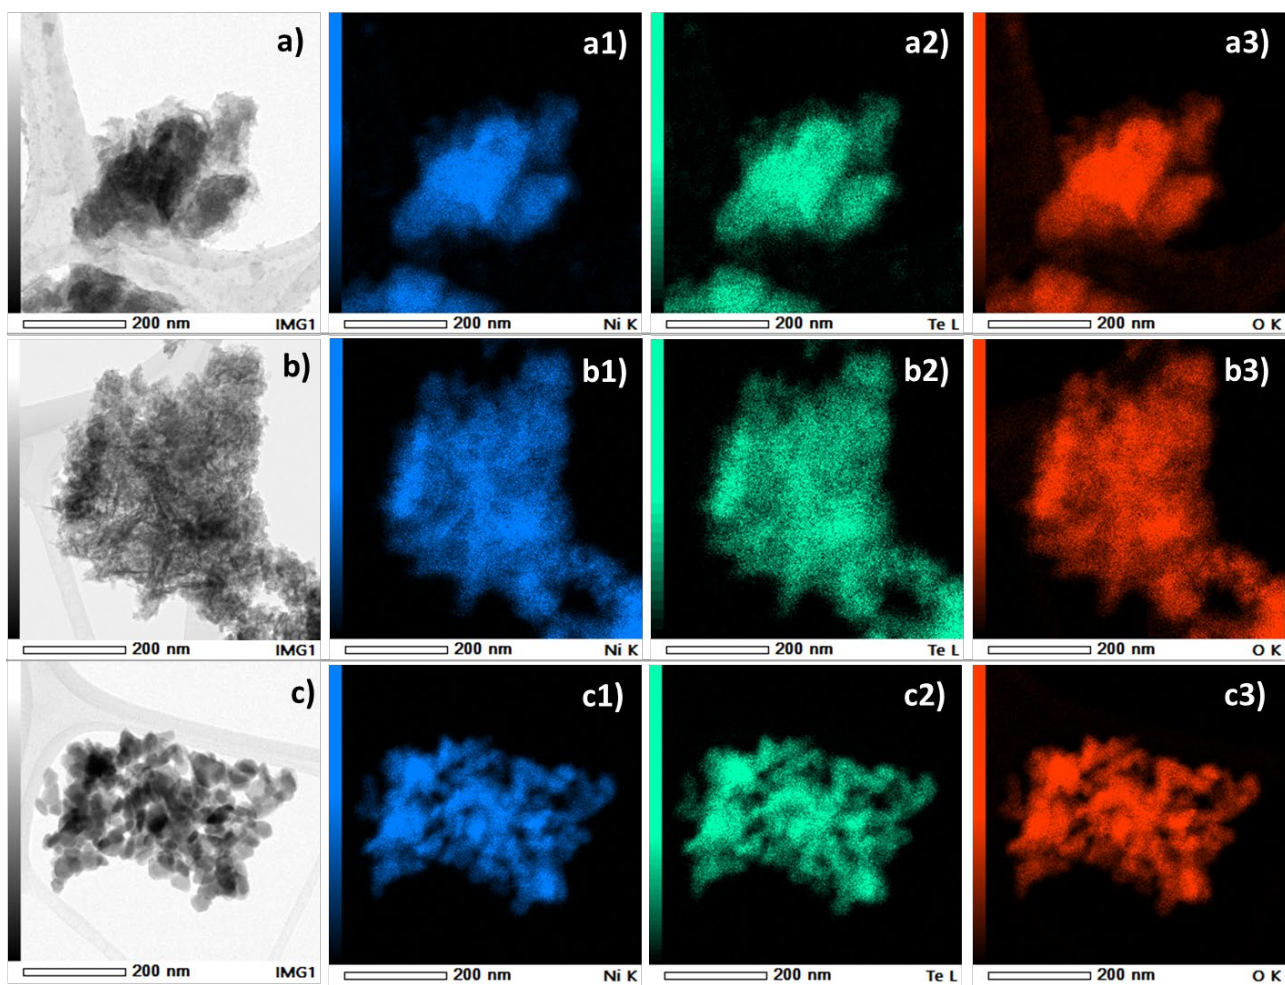

Fig. S2 STEM image and corresponding Ni (green), Te (blue), and O (red) EDS mapping results for (a) NTO\_hydro, (b) NTO\_450, and (c) NTO\_600.

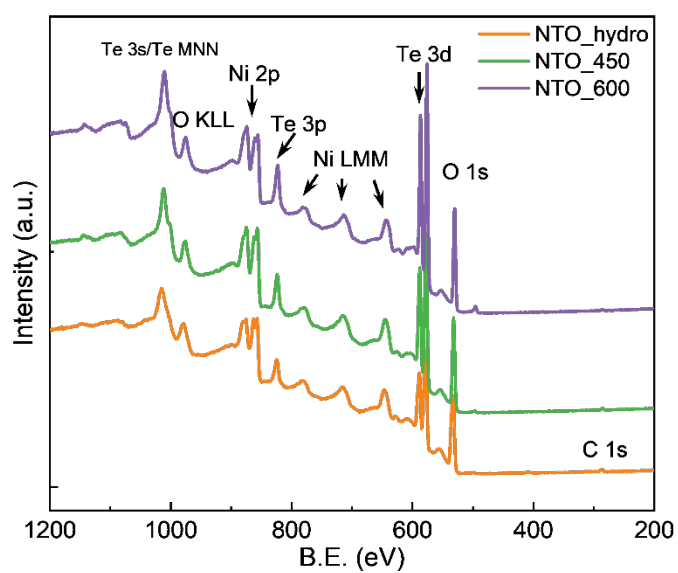

Fig. S3 XPS survey spectra for all the three samples.

**Table S1.** Quantified phase fractions and lattice constants of Ni<sub>3</sub>TeO<sub>6</sub> and NiTeO<sub>4</sub> impurity phase at different temperatures.

| Temperature (°C) / Time                                               |         | Ni <sub>3</sub> TeO <sub>6</sub> |                       |          | NiTeO <sub>4</sub> |                       |          |          |
|-----------------------------------------------------------------------|---------|----------------------------------|-----------------------|----------|--------------------|-----------------------|----------|----------|
|                                                                       |         | Fraction (wt%)                   | Lattice constants (Å) |          | Fraction (wt%)     | Lattice constants (Å) |          |          |
|                                                                       |         |                                  | <i>a</i> = <i>b</i>   | <i>c</i> |                    | <i>a</i>              | <i>b</i> | <i>c</i> |
| Isothermal holding at 600 °C                                          | 0 min   | 100.0                            | -                     | -        | 0                  | -                     | -        | -        |
|                                                                       | 30 min  | 100.0                            | -                     | -        | 0                  | -                     | -        | -        |
|                                                                       | 60 min  | 94.8                             | 5.124                 | 13.845   | 5.2                | -                     | -        | -        |
|                                                                       | 90 min  | 92.1                             | 5.124                 | 13.844   | 7.9                | 6.114                 | 4.667    | 5.575    |
|                                                                       | 120 min | 89.6                             | 5.128                 | 13.841   | 10.4               | 6.116                 | 4.667    | 5.574    |
| Air cooling to room temperature                                       | 550     | 89.6                             | 5.126                 | 13.833   | 10.4               | 6.113                 | 4.664    | 5.572    |
|                                                                       | 500     | 89.6                             | 5.123                 | 13.825   | 10.4               | 6.111                 | 4.661    | 5.569    |
|                                                                       | 450     | 89.6                             | 5.120                 | 13.818   | 10.4               | 6.108                 | 4.659    | 5.566    |
|                                                                       | 400     | 89.6                             | 5.117                 | 13.809   | 10.4               | 6.106                 | 4.656    | 5.563    |
|                                                                       | 350     | 89.6                             | 5.114                 | 13.801   | 10.4               | 6.104                 | 4.653    | 5.559    |
|                                                                       | 300     | 89.6                             | 5.112                 | 13.794   | 10.4               | 6.101                 | 4.651    | 5.558    |
|                                                                       | 250     | 89.6                             | 5.109                 | 13.786   | 10.4               | 6.098                 | 4.649    | 5.555    |
|                                                                       | 200     | 89.6                             | 5.107                 | 13.779   | 10.4               | 6.096                 | 4.646    | 5.553    |
|                                                                       | 150     | 89.6                             | 5.105                 | 13.773   | 10.4               | 6.094                 | 4.643    | 5.549    |
|                                                                       | 100     | 89.6                             | 5.102                 | 13.766   | 10.4               | 6.092                 | 4.642    | 5.548    |
|                                                                       | RT      | 89.6                             | 5.099                 | 13.754   | 10.4               | 6.087                 | 4.638    | 5.545    |
| Coefficient of thermal expansion (10 <sup>-5</sup> °C <sup>-1</sup> ) |         |                                  | 5.29                  | 15.1     | -                  | 4.82                  | 5.01     | 5.24     |

**Table S2.** The deconvolution of Ni 2*p*, Te 3*d* and O 1*s* XPS spectra: the binding energy (B.E., eV), FWHM (full width at half maximum, eV) of peaks.

| Chemical state | Core levels |                           | NTO-hydro | NTO-450 | NTO-600 |
|----------------|-------------|---------------------------|-----------|---------|---------|
| Ni1            | B.E.        | 2 <i>p</i> <sub>3/2</sub> | 856.0     | 855.5   | 855.2   |
|                |             | 2 <i>p</i> <sub>1/2</sub> | 873.1     | 873.5   | 873.1   |
|                | FWHM (eV)   |                           | 1.8       | 2.4     | 2.4     |
| Ni2            | B.E.        | 2 <i>p</i> <sub>3/2</sub> | 858.4     | 858.0   | 857.5   |
|                |             | 2 <i>p</i> <sub>1/2</sub> | 875.7     | 875.7   | 874.7   |
|                | FWHM (eV)   |                           | 3.5       | 3.3     | 3.3     |
| Ni3            | B.E.        | 2 <i>p</i> <sub>3/2</sub> | 861.9     | 861.5   | 861.1   |
|                |             | 2 <i>p</i> <sub>1/2</sub> | 879.5     | 878.9   | 878.2   |
|                | FWHM        |                           | 3.5       | 3.5     | 3.5     |
| Ni4            | B.E.        | 2 <i>p</i> <sub>3/2</sub> | 865.4     | 864.8   | 864.4   |
|                |             | 2 <i>p</i> <sub>1/2</sub> | 882.5     | 881.9   | 881.5   |
|                | FWHM        |                           | 3.5       | 3.5     | 3.5     |
| Te1            | B.E.        | 3 <i>d</i> <sub>5/2</sub> | 577.1     | 576.6   | 576.1   |

|     |      |            |       |       |       |
|-----|------|------------|-------|-------|-------|
|     |      | $3d_{3/2}$ | 587.5 | 586.9 | 586.5 |
|     |      | FWHM       | 2.0   | 1.9   | 1.5   |
| Te2 | B.E. | $3d_{5/2}$ | 578.8 | 578.6 | 577.3 |
|     |      | $3d_{3/2}$ | 589.2 | 589.0 | 587.6 |
|     |      | FWHM       | 2.8   | 2.3   | 2.1   |
| Te3 | B.E. | $3d_{5/2}$ | 581.7 |       |       |
|     |      | $3d_{3/2}$ | 592.3 |       |       |
|     |      | FWHM       | 2.12  |       |       |
| O1  | B.E. | 1s         | 531.0 | 530.9 | 530.8 |
|     |      | FWHM       | 1.66  | 1.59  | 1.35  |
| O2  | B.E. | 1s         | 532.7 | 532.3 | 531.3 |
|     |      | FWHM       | 2.52  | 2.27  | 1.9   |
| O3  | B.E. | 1s         | 535.7 |       |       |
|     |      | FWHM       | 3.15  |       |       |

**Table S3.** Peak characteristics of the diffraction peak located around  $2.2^\circ$  ( $2\theta$  range of  $1.9$ - $2.4^\circ$ ) for the SXRD patterns.

| Temperature     | Associated reaction                          | Intensity | Integrated area | Peak center | FWHM  |
|-----------------|----------------------------------------------|-----------|-----------------|-------------|-------|
| RT              | Stage A: dehydration                         | 2228      | 443             | 2.179       | 0.175 |
| 50 °C           |                                              | 2223      | 436             | 2.180       | 0.175 |
| 100 °C          |                                              | 2219      | 441             | 2.177       | 0.176 |
| 150 °C          |                                              | 2161      | 441             | 2.174       | 0.181 |
| 200 °C          |                                              | 2099      | 434             | 2.172       | 0.186 |
| 250 °C          |                                              | 2006      | 417             | 2.169       | 0.189 |
| 300 °C          | Stage B: dehydroxylation                     | 1705      | 346             | 2.166       | 0.186 |
| 350 °C          |                                              | 833       | 158             | 2.150       | 0.179 |
| 400 °C          |                                              | 305       | 50              | 2.132       | 0.164 |
| 450 °C          | Stage C: $\text{Ni}_3\text{TeO}_6$ formation | 186       | 30              | 2.119       | 0.157 |
| 500 °C          |                                              | 151       | 23              | 2.156       | 0.156 |
| 550 °C          |                                              | 119       | 17              | 2.112       | 0.139 |
| 600 °C          |                                              | 69        | 7.6             | 2.125       | 0.120 |
| 600 °C / 30 min |                                              | 50        | 5.7             | 2.132       | 0.123 |
| 600 °C / 60 min |                                              | 428       | 26              | 2.204       | 0.056 |

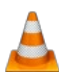

NTO\_calcination  
SXRD patterns.mp4

**Movie. S1** Evolution of 2D diffraction patterns as a function of temperature.

## Reference

- [1] P.J. Chupas, K.W. Chapman, C. Kurtz, J.C. Hanson, P.L. Lee, C.P. Grey, A versatile sample-environment cell for non-ambient X-ray scattering experiments, *J. Appl. Crystallogr.* 41 (2008) 822–824. <https://doi.org/10.1107/S0021889808020165>.
- [2] B.H. Toby, R.B. Von Dreele, GSAS-II : the genesis of a modern open-source all purpose crystallography software package, *J. Appl. Crystallogr.* 46 (2013) 544–549. <https://doi.org/10.1107/S0021889813003531>.
